# Supplementary material for: Alcohol drinking and head and neck cancer risk: the joint effect of intensity and duration
Source: Springer Nature journal article supplement (doi:10.1038/s41416-020-01031-z), 2020-08-24
Supplement: MOESM1 [file 41416_2020_1031_MOESM1_ESM.pdf]

**Supplementary Table S1.** Characteristics of the individual studies from the International Head and Neck Cancer Epidemiology (INHANCE) Consortium used in the current analysis. INHANCE consortium.

| Study name, location                       | Case source     | Age eligibility | Case participation rate, % | Control source                                       | Control participation rate, % | Matched factors                       | Recruitment period |
|--------------------------------------------|-----------------|-----------------|----------------------------|------------------------------------------------------|-------------------------------|---------------------------------------|--------------------|
| <b>Milan (1984-1989), Italy</b>            | Hospital        | <80             | 95 <sup>a</sup>            | Hospital - unhealthy                                 | 95 <sup>a</sup>               | --                                    | 1984-1989          |
| <b>Aviano, Italy</b>                       | Hospital        | >18             | >95 <sup>a</sup>           | Hospital - unhealthy                                 | 95 <sup>a</sup>               | --                                    | 1987-1992          |
| <b>France (1987-1992), France</b>          | Hospital        | NA              | 95 <sup>a</sup>            | Hospital - unhealthy                                 | 95 <sup>a</sup>               | Age, sex, hospital                    | 1987-1992          |
| <b>Italy Multicenter</b>                   | Hospital        | 18-80           | >95                        | Hospital - unhealthy                                 | >95                           | --                                    | 1990-1999          |
| <b>Switzerland</b>                         | Hospital        | <80             | >95                        | Hospital - unhealthy                                 | >95                           | --                                    | 1991-1997          |
| <b>New York, NY, USA (multicenter)</b>     | Hospital        | 21-80           | 91                         | Hospital- unhealthy                                  | 97                            | Age, sex, hospital, year of interview | 1981-1990          |
| <b>Seattle (1985-1995), WA, USA</b>        | Cancer registry | 18-65           | 54.4,63.3 <sup>b</sup>     | Random digit dialing                                 | 63.0,60.9 <sup>b</sup>        | Age, sex                              | 1985-1995          |
| <b>Iowa, IA, USA</b>                       | Hospital        | >18             | 87                         | Hospital - unhealthy                                 | 92                            | Age, sex                              | 1993-2006          |
| <b>North Carolina (1994-1997), NC, USA</b> | Hospital        | >17             | 88                         | Hospital - unhealthy                                 | 86                            | Age, sex                              | 1996-1997          |
| <b>Tampa, FL, USA</b>                      | Hospital        | ≥18             | 98                         | Hospital - noncancer                                 | 90                            | Age, sex, ethnicity                   | 1994-2003          |
| <b>Los Angeles, CA, USA</b>                | Cancer registry | 18-65           | 49                         | Neighborhood                                         | 68                            | Age, sex, neighborhood                | 1999-2004          |
| <b>Houston, TX, USA</b>                    | Hospital        | ≥18             | 95                         | Hospital visitors                                    | >80                           | Age, sex, ethnicity                   | 2001-2006          |
| <b>Puerto Rico</b>                         | Cancer registry | 21-79           | 71                         | Residential records (healthy population)             | 83                            | Age, sex                              | 1992-1995          |
| <b>Latin America</b>                       | Hospital        | 15-79           | 95                         | Hospital - unhealthy                                 | 86                            | Age, sex, ethnicity, city             | 2000-2003          |
| <b>International Multicenter, IARC</b>     | Hospital        | NA              | 88,7                       | Hospital/Community                                   | 87,3                          | Age, sex, center                      | 1992-1997          |
| <b>Boston, MA, USA</b>                     | Hospital        | ≥18             | 88,7                       | Residential records                                  | 48,7                          | Age, sex, neighborhood                | 1999-2003          |
| <b>Sao Paulo, Brazil</b>                   | Hospital        | NA              |                            | Hospital-unhealthy                                   |                               | age, sex, city of residence, hospital | 2002-2007          |
| <b>New York (MSKCC), NY, USA</b>           | Hospital        | NA              | --                         | Blood donors                                         | --                            | Age, sex                              | 1992-1994          |
| <b>Seattle-Leo, WA, USA</b>                | Cancer registry | 20-74           | 81                         | Random digit dialing                                 | 75                            | Age, sex                              | 1983-1987          |
| <b>Western Europe (ARCAGE)</b>             | Hospital        | NA              | 82                         | Hospital-unhealthy (population-based for UK centers) | 68                            | Age, sex, ethnicity, city             | 2000-2005          |

|                                            |                 |       |       |                              |       |                      |           |
|--------------------------------------------|-----------------|-------|-------|------------------------------|-------|----------------------|-----------|
| <b>Japan (2001-2005)</b>                   | Cancer Hospital | 20-79 | 97,00 | Hospital - unhealthy         | 97,00 | Age, sex             | 2001-2005 |
| <b>North Carolina (2002-2006), NC, USA</b> | Cancer registry | 20-80 | 82    | DMV files                    | 61    | Age, sex, ethnicity  | 2002-2006 |
| <b>France Multicenter (2001-2007)</b>      | Cancer registry | <=75  | 82,5  | Random digit dialing         | 80,6  | Age, sex, region     | 2001-2007 |
| <b>Baltimore, MD, USA</b>                  | Hospital        | NA    | 100   | Hospital - benign conditions | 70    | age, sex, HPV status | 2000-2005 |
| <b>Beijing, China</b>                      | Hospital        | 18-80 | 100   | Hospital                     | 100   | Age, sex             | 1988-1989 |
| <b>Milan (2006-2009), Italy</b>            | Hospital        | 18-80 | >95   | Hospital                     | >95   | ----                 | 2006-2009 |

ABBREVIATIONS: ARCAGE: Alcohol-Related Cancers And Genetic susceptibility in Europe; DMV: Department of Motor Vehicles; HPV: Human Papilloma Virus; IARC: International Agency for Research on Cancer; MSKCC: Memorial Sloan Kettering Cancer Center; NA: Not Available.

<sup>a</sup> Participation rate was not formally assessed, estimated response rate reported.

<sup>b</sup> Two response rates are reported because data were collected in two population-based case-control studies, the first from 1985 to 1989 among men and the second from 1990 to 1995 among men and women.

**Supplementary Table S2.** Distribution of cases of oral cavity, oropharyngeal, hypopharyngeal, and laryngeal cancers, and controls according to selected variables. INHANCE Consortium

|                                | Controls |        | Oral cavity |        | Oropharynx |        | Hypopharynx |        | Larynx |        |
|--------------------------------|----------|--------|-------------|--------|------------|--------|-------------|--------|--------|--------|
|                                | n        | (%)    | n           | (%)    | n          | (%)    | n           | (%)    | n      | (%)    |
| <b>TOTAL</b>                   | 24,234   | (100)  | 4085        | (100)  | 3359       | (100)  | 983         | (100)  | 3340   | (100)  |
| <b>Sex<sup>a</sup></b>         |          |        |             |        |            |        |             |        |        |        |
| Female                         | 7533     | (31.1) | 1552        | (38.0) | 780        | (23.2) | 138         | (14.0) | 533    | (16.0) |
| Male                           | 16,701   | (68.9) | 2533        | (62.0) | 2579       | (76.8) | 845         | (86.0) | 2807   | (84.0) |
| <b>Age (years)<sup>a</sup></b> |          |        |             |        |            |        |             |        |        |        |
| <40                            | 1720     | (7.1)  | 284         | (7.0)  | 124        | (3.7)  | 7           | (0.7)  | 68     | (2.0)  |
| 40 to 44                       | 1711     | (7.1)  | 234         | (5.7)  | 211        | (6.3)  | 38          | (3.9)  | 116    | (3.5)  |
| 45 to 49                       | 2479     | (10.2) | 442         | (10.8) | 449        | (13.4) | 104         | (10.6) | 294    | (8.8)  |
| 50 to 54                       | 3547     | (14.6) | 645         | (15.8) | 617        | (18.4) | 184         | (18.7) | 493    | (14.8) |
| 55 to 59                       | 4217     | (17.4) | 743         | (18.2) | 727        | (21.6) | 211         | (21.5) | 682    | (20.4) |
| 60 to 64                       | 3944     | (16.3) | 670         | (16.4) | 542        | (16.1) | 182         | (18.5) | 671    | (20.1) |
| 65 to 69                       | 3431     | (14.2) | 492         | (12.0) | 409        | (12.2) | 144         | (14.6) | 603    | (18.1) |
| 70 to 74                       | 2304     | (9.5)  | 336         | (8.2)  | 206        | (6.1)  | 92          | (9.4)  | 310    | (9.3)  |
| ≥75                            | 881      | (3.6)  | 239         | (5.9)  | 74         | (2.2)  | 21          | (2.1)  | 103    | (3.1)  |
| <b>Study name</b>              |          |        |             |        |            |        |             |        |        |        |
| Aviano                         | 652      | (2.7)  | 52          | (1.3)  | 71         | (2.1)  | 38          | (3.9)  | 91     | (2.7)  |
| Baltimore                      | 162      | (0.7)  | 36          | (0.9)  | 83         | (2.5)  | 4           | (0.4)  | 31     | (0.9)  |
| Beijing                        | 380      | (1.6)  | 377         | (9.2)  |            |        |             |        |        |        |
| Boston                         | 400      | (1.7)  | 90          | (2.2)  | 145        | (4.3)  | 22          | (2.2)  | 68     | (2.0)  |
| France (1987-1992)             | 194      | (0.8)  | 41          | (1.0)  | 50         | (1.5)  | 27          | (2.7)  | 127    | (3.8)  |
| France Multicenter (2001-2007) | 3149     | (13.0) | 343         | (8.4)  | 489        | (14.6) | 275         | (28.0) | 368    | (11.0) |
| Houston                        | 712      | (2.9)  | 182         | (4.5)  | 306        | (9.1)  | 30          | (3.1)  | 108    | (3.2)  |
| International Multicenter      | 1297     | (5.4)  | 640         | (15.7) | 224        | (6.7)  |             |        | 2      | (0.1)  |
| Iowa                           | 550      | (2.3)  | 173         | (4.2)  | 97         | (2.9)  | 7           | (0.7)  | 60     | (1.8)  |
| Italy Multicenter              | 2246     | (9.3)  | 126         | (3.1)  | 193        | (5.7)  | 77          | (7.8)  | 324    | (9.7)  |
| Japan (2001-2005)              | 2796     | (11.5) | 100         | (2.4)  | 63         | (1.9)  | 63          | (6.4)  | 80     | (2.4)  |
| Latin America                  | 993      | (4.1)  | 199         | (4.9)  | 154        | (4.6)  | 66          | (6.7)  | 367    | (11.0) |
| Los Angeles                    | 815      | (3.4)  | 34          | (0.8)  | 93         | (2.8)  | 8           | (0.8)  | 51     | (1.5)  |
| Milan (1984-1989)              | 1450     | (6.0)  | 40          | (1.0)  | 32         | (1.0)  | 25          | (2.5)  | 229    | (6.9)  |
| Milan (2006-2009)              | 568      | (2.3)  | 64          | (1.6)  | 10         | (0.3)  | 9           | (0.9)  | 145    | (4.3)  |
| MSKCC                          | 89       | (0.4)  | 34          | (0.8)  | 5          | (0.1)  | 5           | (0.5)  | 24     | (0.7)  |
| New York Multicenter           | 1098     | (4.5)  | 303         | (7.4)  | 286        | (8.5)  | 17          | (1.7)  | 123    | (3.7)  |
| North Carolina (1994-1997)     | 157      | (0.6)  | 28          | (0.7)  | 24         | (0.7)  | 10          | (1.0)  | 25     | (0.7)  |
| North Carolina (2002-2006)     | 962      | (4.0)  | 99          | (2.4)  | 218        | (6.5)  | 33          | (3.4)  | 239    | (7.2)  |
| Puerto Rico                    | 278      | (1.1)  | 25          | (0.6)  | 35         | (1.0)  | 10          | (1.0)  |        |        |
| Sao Paulo                      | 1145     | (4.7)  | 347         | (8.5)  | 111        | (3.3)  | 52          | (3.4)  | 224    | (6.7)  |
| Seattle (1985-1995)            | 502      | (2.1)  | 160         | (3.9)  | 113        | (3.4)  |             |        |        |        |
| Seattle-Leo                    | 431      | (1.8)  | 113         | (2.8)  | 85         | (2.5)  | 29          | (3.0)  | 116    | (3.5)  |
| Switzerland                    | 823      | (3.4)  | 109         | (2.7)  | 110        | (3.3)  | 72          | (7.3)  | 111    | (3.3)  |
| Tampa                          | 738      | (3.0)  | 16          | (0.4)  | 37         | (1.1)  | 1           | (0.1)  | 38     | (1.1)  |
| Western Europe                 | 1647     | (6.8)  | 354         | (8.7)  | 325        | (9.7)  | 103         | (10.5) | 389    | (11.6) |

Continues

**Supplementary Table S2. Continued**

| <b>Race<sup>a</sup></b>                             |        |        |       |        |      |        |     |        |      |        |
|-----------------------------------------------------|--------|--------|-------|--------|------|--------|-----|--------|------|--------|
| Asian and Pacific Islanders                         | 3779   | (15.6) | 833   | (20.4) | 132  | (3.9)  | 64  | (6.5)  | 87   | (2.6)  |
| Black                                               | 631    | (2.6)  | 149   | (3.6)  | 108  | (3.2)  | 30  | (3.1)  | 109  | (3.3)  |
| Hispanic                                            | 304    | (1.3)  | 29    | (0.7)  | 37   | (1.1)  | 2   | (0.2)  | 7    | (1.0)  |
| Others and Brazilians                               | 2267   | (9.3)  | 564   | (13.8) | 301  | (9.0)  | 121 | (12.3) | 598  | (17.9) |
| White                                               | 17,253 | (71.2) | 2510  | (61.4) | 2781 | (82.8) | 766 | (77.9) | 2514 | (75.3) |
| <b>Education<sup>a</sup></b>                        |        |        |       |        |      |        |     |        |      |        |
| No education                                        | 980    | (4.0)  | 472   | (11.6) | 55   | (1.6)  | 32  | (3.3)  | 94   | (2.8)  |
| ≤Junior high school                                 | 8408   | (34.7) | 1341  | (32.8) | 969  | (28.8) | 409 | (41.6) | 1495 | (44.8) |
| Some high school                                    | 4340   | (17.9) | 787   | (19.3) | 715  | (21.3) | 257 | (26.1) | 632  | (18.9) |
| High school graduate                                | 3097   | (12.8) | 567   | (13.9) | 510  | (15.2) | 121 | (12.3) | 458  | (13.7) |
| Technical sch., some college                        | 3680   | (15.2) | 513   | (12.6) | 559  | (16.6) | 90  | (9.2)  | 408  | (12.2) |
| ≥College graduate                                   | 3729   | (15.4) | 405   | (9.9)  | 551  | (16.4) | 74  | (7.5)  | 253  | (7.6)  |
| <b>Cigarette smoking status</b>                     |        |        |       |        |      |        |     |        |      |        |
| Never user                                          | 10,570 | (43.6) | 1263  | (30.9) | 660  | (19.6) | 72  | (7.3)  | 223  | (6.7)  |
| Former user                                         | 7804   | (32.2) | 717   | (17.6) | 939  | (28.0) | 292 | (29.7) | 1072 | (32.1) |
| Current user                                        | 5860   | (24.2) | 2105  | (51.5) | 1760 | (52.4) | 619 | (63.0) | 2045 | (61.2) |
| <b>Cigarette smoking intensity (cigarettes/day)</b> |        |        |       |        |      |        |     |        |      |        |
| ≥1-10                                               | 4046   | (16.7) | 475   | (11.6) | 452  | (13.5) | 138 | (14.0) | 352  | (10.5) |
| >10-20                                              | 5837   | (24.1) | 1254  | (30.7) | 1157 | (34.4) | 391 | (39.8) | 1366 | (40.9) |
| >20-30                                              | 1826   | (7.5)  | 567   | (13.9) | 503  | (15.0) | 186 | (18.9) | 657  | (19.7) |
| >30-40                                              | 1301   | (5.4)  | 373   | (9.1)  | 412  | (12.3) | 149 | (15.2) | 503  | (15.1) |
| >40                                                 | 654    | (2.7)  | 153   | (3.7)  | 175  | (5.2)  | 47  | (4.8)  | 239  | (7.2)  |
| <b>Cigarette smoking duration (years)</b>           |        |        |       |        |      |        |     |        |      |        |
| 1-10                                                | 1801   | (7.4)  | 132   | (3.2)  | 166  | (4.9)  | 20  | (2.0)  | 72   | (2.2)  |
| 11-20                                               | 2696   | (11.1) | 228   | (5.6)  | 220  | (6.5)  | 56  | (5.7)  | 169  | (5.1)  |
| 21-30                                               | 3426   | (14.1) | 572   | (14.0) | 562  | (16.7) | 172 | (17.5) | 523  | (15.7) |
| 31-40                                               | 3327   | (13.7) | 1004  | (24.6) | 968  | (28.8) | 347 | (35.3) | 1084 | (32.5) |
| >40                                                 | 2414   | (10.0) | 886   | (21.7) | 783  | (23.3) | 316 | (32.1) | 1269 | (38.0) |
| <b>Cigar smoking status</b>                         |        |        |       |        |      |        |     |        |      |        |
| Never user                                          | 19,438 | (80.2) | 3,347 | (81.9) | 2991 | (89.0) | 853 | (86.8) | 3023 | (90.5) |
| Current user                                        | 1004   | (4.1)  | 186   | (4.6)  | 248  | (7.4)  | 57  | (5.8)  | 197  | (5.9)  |
| Unknown                                             | 3792   | (15.6) | 552   | (13.5) | 120  | (3.6)  | 73  | (7.4)  | 120  | (3.6)  |
| <b>Pipe smoking status</b>                          |        |        |       |        |      |        |     |        |      |        |
| Never user                                          | 20,269 | (83.6) | 3719  | (91.0) | 3073 | (91.5) | 862 | (87.7) | 3074 | (92.0) |
| Current user                                        | 1125   | (4.6)  | 242   | (5.9)  | 205  | (6.1)  | 52  | (5.3)  | 164  | (4.9)  |
| Unknown                                             | 2840   | (11.7) | 124   | (3.0)  | 81   | (2.4)  | 69  | (7.0)  | 102  | (3.1)  |

ABBREVIATIONS: MSKCC: Memorial Sloan Kettering Cancer Center.

<sup>a</sup> We excluded subjects with missing information on age, sex, race and cigarette smoking habits. Missing values for education were imputed according to the INHANCE protocol.

**Supplementary Table S3.** Odds Ratio (OR) and 95% Credible Intervals (CI) of cases of oral cavity, oropharyngeal, hypopharyngeal, and laryngeal cancers, for selected levels of alcohol intensity and duration.  
INHANCE Consortium

|           |           | Oral cavity |            | Oropharynx |            | Hypopharynx |             | Larynx |           |
|-----------|-----------|-------------|------------|------------|------------|-------------|-------------|--------|-----------|
|           |           | OR          | 95% CI     | OR         | 95% CI     | OR          | 95% CI      | OR     | 95% CI    |
| <b>1</b>  | <b>5</b>  | 1.40        | 1.30-1.51  | 1.25       | 1.14-1.36  | 1.84        | 1.58-2.20   | 1.14   | 1.08-1.20 |
|           | <b>10</b> | 1.38        | 1.29-1.48  | 1.38       | 1.26-1.52  | 1.81        | 1.55-2.17   | 1.12   | 1.06-1.19 |
|           | <b>20</b> | 1.35        | 1.25-1.45  | 1.67       | 1.46-1.99  | 1.76        | 1.48-2.13   | 1.09   | 1.01-1.17 |
|           | <b>40</b> | 1.28        | 1.14-1.44  | 1.56       | 1.16-2.73  | 1.67        | 1.28-2.21   | 1.03   | 0.90-1.16 |
| <b>2</b>  | <b>5</b>  | 1.97        | 1.72-2.29  | 1.44       | 1.19-1.70  | 3.35        | 2.52-4.83   | 1.32   | 1.20-1.46 |
|           | <b>10</b> | 1.94        | 1.71-2.21  | 1.61       | 1.39-1.86  | 3.25        | 2.49-4.55   | 1.31   | 1.20-1.44 |
|           | <b>20</b> | 1.86        | 1.68-2.08  | 2.01       | 1.74-2.40  | 3.07        | 2.42-4.14   | 1.29   | 1.18-1.41 |
|           | <b>40</b> | 1.73        | 1.54-1.94  | 1.97       | 1.45-2.73  | 2.73        | 2.10-3.64   | 1.25   | 1.10-1.40 |
| <b>5</b>  | <b>5</b>  | 5.52        | 3.92-7.97  | 2.19       | 1.35-3.32  | 11.95       | 6.94-25.47  | 2.07   | 1.63-2.65 |
|           | <b>10</b> | 5.32        | 3.96-7.32  | 2.56       | 1.81-3.53  | 11.41       | 6.93-23.31  | 2.09   | 1.70-2.60 |
|           | <b>20</b> | 4.95        | 3.95-6.27  | 3.49       | 2.88-4.38  | 10.38       | 6.85-19.58  | 2.14   | 1.83-2.52 |
|           | <b>40</b> | 4.29        | 3.59-5.16  | 3.93       | 2.92-6.03  | 8.58        | 6.06-15.20  | 2.23   | 1.96-2.52 |
| <b>10</b> | <b>5</b>  | 6.07        | 1.99-13.49 | 4.43       | 1.64-10.13 | 21.62       | 4.45-82.86  | 4.37   | 2.71-7.15 |
|           | <b>10</b> | 6.23        | 2.32-12.67 | 5.55       | 2.74-10.53 | 21.65       | 5.31-75.35  | 4.56   | 3.01-6.98 |
|           | <b>20</b> | 6.54        | 3.19-11.13 | 8.79       | 6.16-12.65 | 21.91       | 7.43-65.55  | 4.95   | 3.66-6.77 |
|           | <b>40</b> | 7.32        | 4.75-10.31 | 12.48      | 8.89-22.72 | 23.29       | 11.85-51.70 | 5.88   | 4.83-7.16 |

## **Legends to supplementary figures**

**Supplementary Figure S1.** Flow-chart of subjects' selection process. INHANCE Consortium.

**Supplementary Figure S2.** Bivariate spline models estimates of odds ratios of oral cavity, oropharyngeal, and laryngeal cancers in current drinkers for the joint effect of intensity and duration of alcohol consumption, in strata of gender. On the grid, black thicker lines represent knot locations, at 5 drinks/day for oral cavity in men, and at 30 years for oropharyngeal cancer in men. INHANCE Consortium.

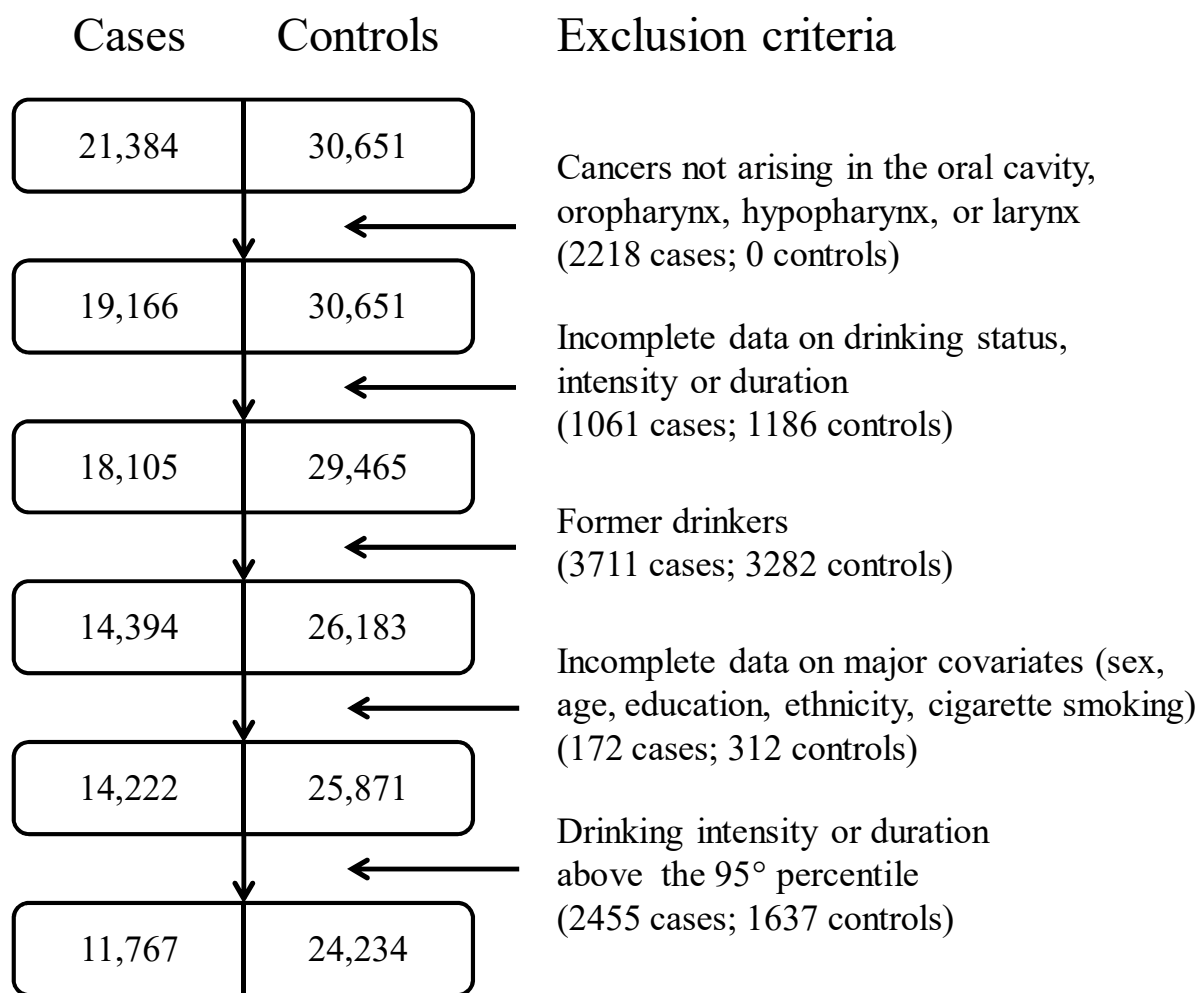

**Men**

**Oral cavity**

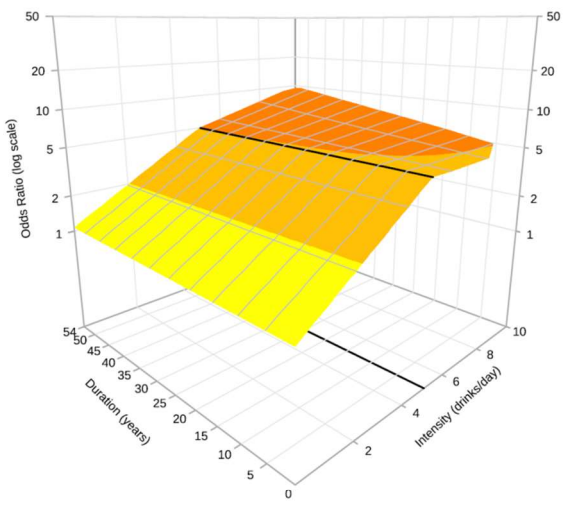

**Oropharynx**

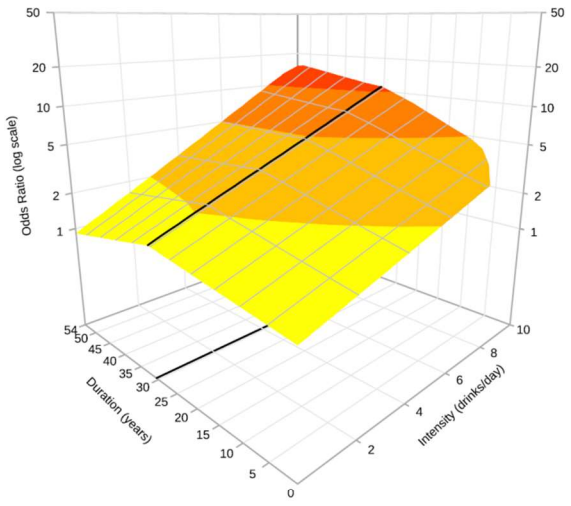

**Larynx**

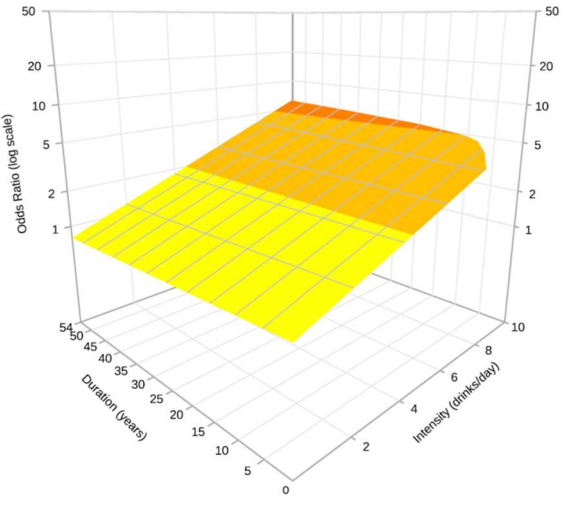

**Women**

**Oral cavity**

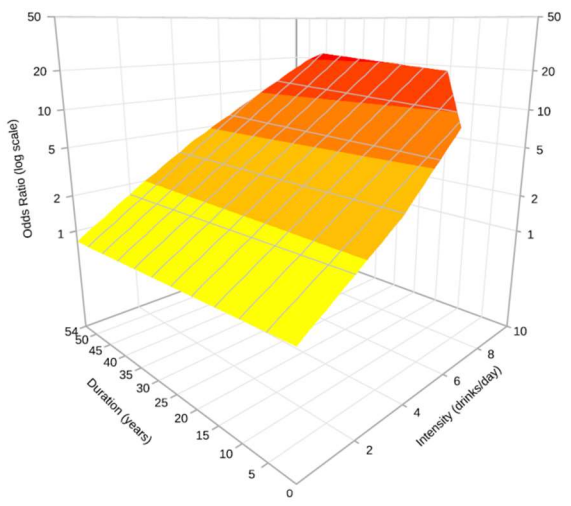

**Oropharynx**

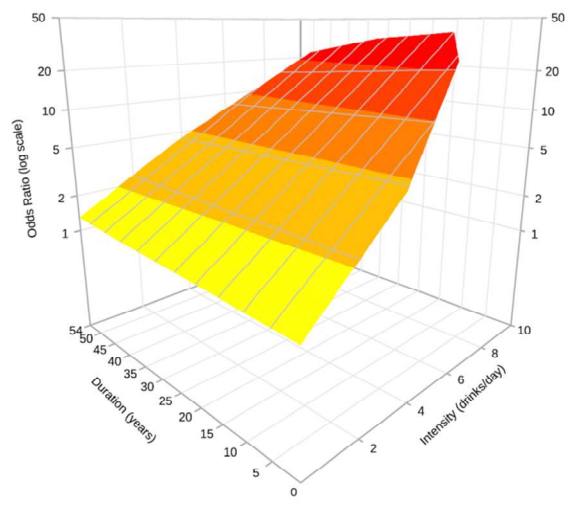

**Larynx**

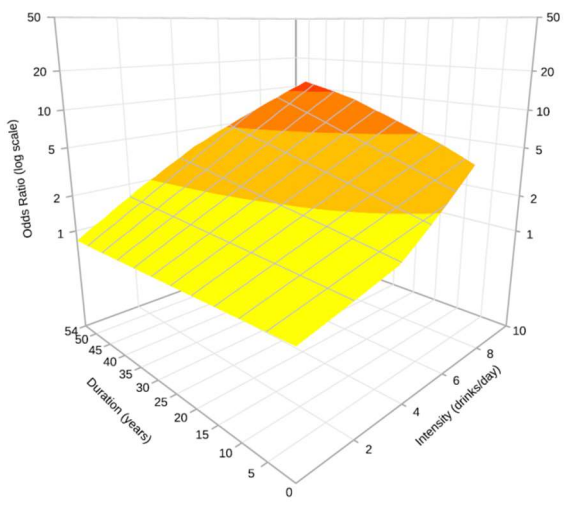

**Odds ratio:** ■ <2    ■ 2 to <5    ■ 5 to <10    ■ 10 to <20    ■ ≥20
